# Supplementary material
Source: PubMed Central journal article supplement (PMC4485618)
Supplement: NIHMS701672-supplement-supmat.pdf [file NIHMS701672-supplement-supmat.pdf]

## Supplementary Information for

### Sulfur K-edge XAS and DFT Calculations on Nitrile Hydratase: Geometric and Electronic Structure of the Non-heme Iron Active Site

Abhishek Dey, Marina Chow, Kayoko Taniguchi, Priscilla Lugo-Mas, Steven Davin, Mizuo Maeda, Julie A. Kovacs, Masafumi Odaka, Keith O. Hodgson, Britt Hedman, and Edward I. Solomon

#### Complete Reference 47

Gaussian 03, Revision C.02, Frisch, M. J.; Trucks, G. W.; Schlegel, H. B.; Scuseria, G. E.; Robb, M. A.; Cheeseman, J. R.; Montgomery, Jr., J. A.; Vreven, T.; Kudin, K. N.; Burant, J. C.; Millam, J. M.; Iyengar, S. S.; Tomasi, J.; Barone, V.; Mennucci, B.; Cossi, M.; Scalmani, G.; Rega, N.; Petersson, G. A.; Nakatsuji, H.; Hada, M.; Ehara, M.; Toyota, K.; Fukuda, R.; Hasegawa, J.; Ishida, M.; Nakajima, T.; Honda, Y.; Kitao, O.; Nakai, H.; Klene, M.; Li, X.; Knox, J. E.; Hratchian, H. P.; Cross, J. B.; Bakken, V.; Adamo, C.; Jaramillo, J.; Gomperts, R.; Stratmann, R. E.; Yazyev, O.; Austin, A. J.; Cammi, R.; Pomelli, C.; Ochterski, J. W.; Ayala, P. Y.; Morokuma, K.; Voth, G. A.; Salvador, P.; Dannenberg, J. J.; Zakrzewski, V. G.; Dapprich, S.; Daniels, A. D.; Strain, M. C.; Farkas, O.; Malick, D. K.; Rabuck, A. D.; Raghavachari, K.; Foresman, J. B.; Ortiz, J. V.; Cui, Q.; Baboul, A. G.; Clifford, S.; Cioslowski, J.; Stefanov, B. B.; Liu, G.; Liashenko, A.; Piskorz, P.; Komaromi, I.; Martin, R. L.; Fox, D. J.; Keith, T.; Al-Laham, M. A.; Peng, C. Y.; Nanayakkara, A.; Challacombe, M.; Gill, P. M. W.; Johnson, B.; Chen, W.; Wong, M. W.; Gonzalez, C.; and Pople, J. A.; Gaussian, Inc., Wallingford CT, 2004.

#### Optimized Coordinates

##### (1) Fe(III)(ADIT)<sub>2</sub>

|    |          |          |          |
|----|----------|----------|----------|
| C  | 5.416480 | 5.340387 | 9.164817 |
| C  | 5.567788 | 5.423677 | 7.679549 |
| C  | 6.494733 | 6.454528 | 7.090311 |
| C  | 4.921914 | 4.566591 | 5.505796 |
| C  | 3.540248 | 4.189993 | 4.986911 |
| C  | 0.910781 | 3.782488 | 9.059984 |
| C  | 1.268113 | 2.331036 | 9.080983 |
| C  | 0.304906 | 1.344856 | 9.688214 |
| C  | 2.875602 | 0.601209 | 8.551481 |
| C  | 4.397679 | 0.599791 | 8.605946 |
| N  | 3.063049 | 2.996152 | 5.743854 |
| N  | 4.862843 | 4.585210 | 6.978195 |
| N  | 2.418258 | 2.003693 | 8.568196 |
| N  | 4.903750 | 1.595880 | 7.617597 |
| S  | 4.629732 | 3.764852 | 9.688394 |
| S  | 1.983697 | 4.745724 | 7.920864 |
| Fe | 3.640968 | 3.295418 | 7.777168 |
| H  | 4.779125 | 6.179723 | 9.495248 |
| H  | 6.387574 | 5.457709 | 9.666765 |
| H  | 6.930983 | 7.080214 | 7.876796 |
| H  | 5.967186 | 7.114483 | 6.385469 |
| H  | 7.319454 | 5.976906 | 6.539042 |
| H  | 5.239190 | 5.529445 | 5.084102 |
| H  | 5.666806 | 3.813054 | 5.197781 |
| H  | 3.557722 | 4.013880 | 3.901681 |
| H  | 2.832766 | 5.003202 | 5.194780 |

|   |           |           |           |
|---|-----------|-----------|-----------|
| H | 1.022442  | 4.181786  | 10.083565 |
| H | -0.143113 | 3.921027  | 8.778207  |
| H | -0.605380 | 1.848638  | 10.031451 |
| H | 0.751373  | 0.827480  | 10.551220 |
| H | 0.014687  | 0.573781  | 8.958240  |
| H | 2.466849  | 0.019686  | 9.388671  |
| H | 2.521647  | 0.127496  | 7.619875  |
| H | 4.799940  | -0.407636 | 8.424747  |
| H | 4.735696  | 0.935272  | 9.594939  |
| H | 3.369759  | 2.136418  | 5.276302  |
| H | 2.038403  | 2.988426  | 5.748117  |
| H | 4.978443  | 1.162034  | 6.691208  |
| H | 5.847198  | 1.890273  | 7.887609  |

(2) Fe(III)(ADIT)(ADIT-O)

|    |           |           |           |
|----|-----------|-----------|-----------|
| H  | -1.363045 | -2.890914 | -5.571435 |
| H  | -1.752508 | -1.180992 | -5.247823 |
| C  | -1.403833 | -2.119556 | -4.789919 |
| H  | 0.632046  | -1.371426 | -4.835617 |
| C  | -3.472152 | -3.088387 | -4.016232 |
| C  | -0.041496 | -1.900882 | -4.144764 |
| H  | 0.425849  | -2.865590 | -3.897825 |
| N  | -2.367185 | -2.478903 | -3.724293 |
| C  | -4.490396 | -3.286424 | -2.957654 |
| O  | -1.698929 | 1.091803  | -3.113137 |
| H  | -0.533704 | -0.130363 | -3.100173 |
| N  | -0.257216 | -1.132699 | -2.888582 |
| S  | -2.826578 | 0.269535  | -2.445031 |
| H  | 0.608807  | -1.092868 | -2.343332 |
| Fe | -1.967384 | -1.821317 | -1.967540 |
| H  | -1.345876 | -4.353137 | -1.500710 |
| H  | 0.089773  | -3.561879 | -1.565493 |
| S  | -3.900336 | -2.637926 | -1.333864 |
| N  | -0.873514 | -3.488842 | -1.221547 |
| C  | -2.893345 | 0.839746  | -0.660438 |
| N  | -1.551420 | -1.097854 | -0.220780 |
| C  | -0.878363 | -3.374039 | 0.267448  |
| C  | -1.995966 | 0.037672  | 0.208160  |
| H  | -1.869915 | -3.693212 | 0.612060  |
| H  | 0.388399  | -1.620813 | 0.387950  |
| H  | -0.119334 | -4.017222 | 0.735874  |
| C  | -0.649199 | -1.911049 | 0.619983  |
| H  | -0.816785 | -1.726601 | 1.690072  |
| H  | -5.416211 | -2.755305 | -3.239578 |
| H  | -4.766323 | -4.348447 | -2.856915 |
| H  | -2.641292 | 1.909882  | -0.660195 |
| H  | -3.943487 | 0.736752  | -0.339216 |
| H  | -3.675614 | -3.417563 | -5.043550 |
| H  | -1.721573 | 0.401850  | 1.206948  |

(3) CoIII( $\eta^2$ -SO)(SO<sub>2</sub>)N<sub>3</sub>(Pr,Pr)

|   |           |          |          |
|---|-----------|----------|----------|
| C | 1.991146  | 3.385327 | 2.163664 |
| C | 2.149987  | 2.666798 | 3.453502 |
| C | -3.124389 | 3.173057 | 3.523622 |
| C | -3.185172 | 2.269709 | 2.353120 |
| H | 1.350160  | 1.524872 | 4.814382 |

|    |           |           |          |
|----|-----------|-----------|----------|
| H  | 0.115512  | -0.610895 | 4.026101 |
| H  | -2.224007 | 1.021463  | 1.172533 |
| H  | -1.295492 | -0.763612 | 3.205344 |
| Co | -0.459195 | 1.686996  | 2.937809 |
| O  | 0.570475  | 1.270284  | 1.184593 |
| O  | -0.991055 | 4.034399  | 4.914283 |
| O  | -1.987165 | 1.775476  | 5.494972 |
| S  | 0.446038  | 2.828203  | 1.321658 |
| S  | -1.567812 | 2.762593  | 4.473060 |
| N  | 1.185106  | 1.940469  | 3.892264 |
| N  | -2.140279 | 1.594420  | 2.019712 |
| N  | -0.751567 | -0.123516 | 3.787854 |
| H  | -1.284081 | 0.069815  | 4.651394 |
| H  | -3.045081 | 4.223824  | 3.200260 |
| H  | -3.986641 | 3.074570  | 4.197758 |
| H  | 1.889140  | 4.471176  | 2.335558 |
| H  | 2.844655  | 3.233867  | 1.486103 |
| H  | 3.079291  | 2.772469  | 4.023988 |
| H  | -4.105138 | 2.193375  | 1.763553 |

(4) Fe(ADIT)(ADIT-O-ZnCl<sub>3</sub>)

|    |           |           |           |
|----|-----------|-----------|-----------|
| H  | 1.472606  | 2.663736  | -3.723373 |
| H  | 1.250850  | 0.083909  | -3.085569 |
| H  | -0.133315 | 3.055112  | -3.035388 |
| C  | 0.932343  | 2.895545  | -2.797612 |
| Cl | -2.639519 | 1.831689  | -2.579701 |
| H  | 2.789085  | 0.748262  | -2.526380 |
| H  | 1.332709  | 3.835075  | -2.385124 |
| C  | 1.759404  | 0.519152  | -2.209428 |
| C  | 1.044116  | 1.768946  | -1.809926 |
| Cl | -5.856349 | 0.069039  | -1.219304 |
| Zn | -4.068817 | 1.309760  | -0.839403 |
| S  | 1.793716  | -0.736894 | -0.864654 |
| H  | -0.772155 | -2.969600 | -0.466994 |
| H  | -1.273909 | 2.902696  | -0.767938 |
| N  | 0.495186  | 1.793354  | -0.631961 |
| H  | 0.176017  | 3.904234  | -0.472577 |
| S  | -1.414121 | -0.634094 | -0.474446 |
| C  | -0.316845 | 2.956299  | -0.213682 |
| O  | -2.694790 | -0.092574 | 0.232399  |
| C  | -1.238280 | -2.319235 | 0.292848  |
| Cl | -3.922477 | 2.839341  | 0.866127  |
| H  | -2.264223 | -2.675548 | 0.464068  |
| Fe | 0.431974  | 0.258458  | 0.548580  |
| C  | -0.569656 | 2.867274  | 1.280901  |
| H  | 2.750212  | 1.232798  | 1.298132  |
| H  | -1.835543 | 1.213819  | 1.248189  |
| H  | -1.422671 | 3.506150  | 1.553786  |
| C  | -0.418192 | -2.321179 | 1.543485  |
| N  | -0.871629 | 1.443076  | 1.596683  |
| H  | 0.317805  | 3.177512  | 1.856910  |
| N  | 0.346151  | -1.286717 | 1.742148  |
| H  | -0.997397 | -4.350663 | 1.955569  |
| H  | 3.055595  | -0.939713 | 1.883804  |
| N  | 1.986579  | 0.855920  | 1.865592  |

|   |           |           |          |
|---|-----------|-----------|----------|
| C | -0.534378 | -3.502002 | 2.472483 |
| H | 1.717046  | 1.589651  | 2.528845 |
| C | 2.430760  | -0.368448 | 2.582367 |
| H | -0.924245 | 1.314901  | 2.612315 |
| H | 0.438960  | -3.826285 | 2.865350 |
| C | 1.193677  | -1.180954 | 2.943459 |
| H | -1.174482 | -3.250965 | 3.334290 |
| H | 1.488587  | -2.161403 | 3.341485 |
| H | 3.026617  | -0.139806 | 3.479446 |
| H | 0.616116  | -0.670512 | 3.733214 |

CH<sub>3</sub>SO<sup>-</sup>

|   |               |               |               |
|---|---------------|---------------|---------------|
| C | -1.3780457326 | -0.5196224867 | 0             |
| S | 0.4670169964  | -0.3252520474 | 0             |
| O | 0.7619359749  | 1.2517309319  | 0             |
| H | -1.6324736329 | -1.591638675  | 0             |
| H | -1.8335058567 | -0.050220551  | -0.8875861821 |
| H | -1.8335058567 | -0.050220551  | 0.8875861821  |

CH<sub>3</sub>SOH

|   |         |         |         |
|---|---------|---------|---------|
| C | -1.2532 | -0.6015 | 0.0000  |
| O | 0.2307  | -0.3822 | 0.0000  |
| H | -1.3313 | -1.6964 | 0.0000  |
| H | -1.7093 | -0.1910 | -0.9111 |
| H | -1.7093 | -0.1910 | 0.9111  |
| H | 0.4231  | 0.5991  | 0.0000  |

CH<sub>3</sub>SO-C(NH<sub>2</sub>)<sup>+</sup>

|   |         |         |         |
|---|---------|---------|---------|
| N | -1.5685 | 1.0613  | 0.1731  |
| C | -2.2524 | -0.0677 | 0.0095  |
| N | -3.5961 | -0.0676 | -0.0518 |
| N | -1.5623 | -1.2064 | -0.0763 |
| H | -4.1166 | -0.9303 | -0.1202 |
| H | -4.1204 | 0.7940  | 0.0047  |
| H | -2.0150 | -2.0641 | -0.3619 |
| H | -0.5214 | -1.1041 | -0.0941 |
| H | -2.0409 | 1.9482  | 0.2765  |
| H | -0.5194 | 0.9724  | 0.1433  |
| C | 3.3374  | 0.0666  | 0.9117  |
| S | 2.3105  | 0.1195  | -0.5894 |
| O | 0.7887  | -0.0344 | 0.0054  |
| H | 4.3839  | 0.1601  | 0.6042  |
| H | 3.2034  | -0.8809 | 1.4407  |
| H | 3.0877  | 0.8906  | 1.5861  |

CH<sub>3</sub>SO<sub>2</sub><sup>-</sup>

|   |           |           |           |
|---|-----------|-----------|-----------|
| C | -1.589229 | -0.000252 | 0.113548  |
| S | 0.239246  | 0.000027  | -0.385425 |
| O | 0.715552  | 1.280201  | 0.300918  |
| H | -2.074690 | -0.909166 | -0.277422 |
| H | -2.074732 | 0.908966  | -0.276663 |
| H | -1.583930 | -0.000712 | 1.215188  |
| O | 0.716017  | -1.279954 | 0.300922  |

CH<sub>3</sub>SO<sub>2</sub>H

|   |           |           |          |
|---|-----------|-----------|----------|
| C | -1.253198 | -0.601545 | 0.000000 |
|---|-----------|-----------|----------|

|   |           |           |           |
|---|-----------|-----------|-----------|
| S | 0.528325  | -0.338219 | 0.000000  |
| O | 1.725233  | -1.313492 | 0.000000  |
| O | 0.766213  | 1.354375  | 0.000000  |
| H | -1.331282 | -1.696421 | 0.000000  |
| H | -1.709315 | -0.190981 | -0.911121 |
| H | -1.709315 | -0.190981 | 0.911121  |
| H | 1.743654  | 1.445710  | 0.000000  |

NHase-NO optimized in gas phase

|    |           |           |           |
|----|-----------|-----------|-----------|
| N  | 27.895401 | 78.897970 | 55.472124 |
| N  | 29.653306 | 79.612015 | 56.763005 |
| C  | 28.346000 | 79.649000 | 56.463000 |
| N  | 29.170732 | 75.991510 | 58.712687 |
| C  | 27.965000 | 75.425000 | 59.004000 |
| N  | 27.556381 | 75.641406 | 60.330356 |
| N  | 27.273316 | 74.799752 | 58.103292 |
| H  | 26.761118 | 75.070216 | 60.607160 |
| H  | 28.318652 | 75.558239 | 61.004743 |
| H  | 26.487389 | 74.285181 | 58.508158 |
| H  | 27.386331 | 74.544679 | 56.492462 |
| H  | 29.427437 | 76.823553 | 59.226336 |
| H  | 29.539709 | 75.935439 | 57.752564 |
| N  | 30.115582 | 73.774474 | 54.668329 |
| O  | 30.178585 | 73.122209 | 55.637898 |
| Fe | 29.739869 | 74.892879 | 53.497295 |
| N  | 28.946019 | 73.613312 | 52.268769 |
| C  | 27.636715 | 73.064171 | 52.585149 |
| C  | 26.733716 | 74.196622 | 53.037369 |
| S  | 27.618416 | 75.197516 | 54.313613 |
| O  | 27.287327 | 74.110637 | 55.557170 |
| H  | 26.508137 | 74.899511 | 52.227048 |
| H  | 25.813462 | 73.852632 | 53.524510 |
| H  | 27.222487 | 72.569419 | 51.691409 |
| H  | 27.703346 | 72.302562 | 53.382152 |
| N  | 31.283011 | 74.719597 | 52.259675 |
| C  | 31.157746 | 73.554018 | 51.377218 |
| C  | 29.771741 | 72.938540 | 51.441394 |
| O  | 29.454274 | 71.935207 | 50.778835 |
| H  | 31.387974 | 73.822468 | 50.334540 |
| H  | 31.885702 | 72.772692 | 51.652502 |
| C  | 32.569844 | 76.760093 | 52.857029 |
| C  | 32.442541 | 76.566583 | 54.362466 |
| S  | 30.696773 | 76.495595 | 54.864714 |
| C  | 32.348415 | 75.509458 | 52.001900 |
| O  | 33.172777 | 75.265448 | 51.094366 |
| O  | 30.240527 | 77.956443 | 54.675513 |
| O  | 30.707171 | 76.115729 | 56.321057 |
| H  | 31.883321 | 77.555035 | 52.526027 |
| H  | 33.592303 | 77.089499 | 52.626603 |
| H  | 32.887639 | 75.620828 | 54.705562 |
| H  | 32.866376 | 77.403510 | 54.938807 |
| C  | 28.833000 | 76.056000 | 50.400000 |
| S  | 28.867503 | 76.631655 | 52.165306 |
| N  | 27.529772 | 80.488826 | 57.151427 |
| H  | 26.915403 | 78.650226 | 55.397492 |
| H  | 28.629448 | 78.372913 | 54.921671 |

|   |           |           |           |
|---|-----------|-----------|-----------|
| H | 30.084033 | 80.455743 | 57.125271 |
| H | 30.211195 | 78.991215 | 56.127862 |
| H | 27.755288 | 80.684307 | 58.123891 |
| H | 26.543727 | 80.496055 | 56.920626 |
| H | 28.385884 | 76.882847 | 49.834012 |
| H | 28.234424 | 75.145819 | 50.287199 |
| H | 29.859377 | 75.880834 | 50.061444 |

NHase-NO optimized in PCM 4.0

|    |         |         |         |
|----|---------|---------|---------|
| N  | 2.7939  | 1.6427  | 2.1135  |
| N  | 3.7166  | 2.7245  | 0.2944  |
| C  | 3.8707  | 2.1698  | 1.5058  |
| N  | 3.4997  | -1.1812 | -2.0138 |
| C  | 4.2654  | -1.9402 | -1.2138 |
| N  | 5.5334  | -2.2662 | -1.6150 |
| N  | 3.8236  | -2.3159 | -0.0075 |
| H  | 5.9353  | -3.1294 | -1.2357 |
| H  | 5.7813  | -2.0900 | -2.5937 |
| H  | 4.4370  | -2.9086 | 0.5587  |
| H  | 2.7652  | -2.3084 | 0.2327  |
| H  | 3.8449  | -0.9117 | -2.9378 |
| H  | 2.6371  | -0.6943 | -1.6948 |
| N  | -0.8184 | -1.2516 | -1.4053 |
| O  | -0.5271 | -1.9067 | -2.3424 |
| Fe | -1.1410 | -0.2938 | -0.1333 |
| N  | -2.4138 | -1.5021 | 0.6674  |
| C  | -1.9380 | -2.6605 | 1.4215  |
| C  | -0.7490 | -2.2287 | 2.2716  |
| S  | 0.4692  | -1.2988 | 1.2118  |
| O  | 1.2211  | -2.4619 | 0.4151  |
| H  | -1.0493 | -1.5252 | 3.0652  |
| H  | -0.1871 | -3.0756 | 2.7026  |
| H  | -2.7605 | -3.0528 | 2.0496  |
| H  | -1.6299 | -3.4817 | 0.7383  |
| N  | -2.7765 | 0.5806  | -0.8455 |
| C  | -3.9489 | -0.2980 | -0.7359 |
| C  | -3.6778 | -1.4930 | 0.1799  |
| O  | -4.5583 | -2.3516 | 0.4302  |
| H  | -4.8265 | 0.2643  | -0.3634 |
| H  | -4.2504 | -0.6945 | -1.7299 |
| C  | -1.8888 | 2.8555  | -1.3350 |
| C  | -0.6301 | 2.3521  | -2.0462 |
| S  | 0.3362  | 1.2326  | -0.9650 |
| C  | -3.0485 | 1.8487  | -1.2443 |
| O  | -4.2084 | 2.2464  | -1.5363 |
| O  | 0.9968  | 2.1958  | 0.0497  |
| O  | 1.3725  | 0.5988  | -1.8974 |
| H  | -1.6175 | 3.1983  | -0.3179 |
| H  | -2.2840 | 3.7277  | -1.8842 |
| H  | -0.8669 | 1.7715  | -2.9553 |
| H  | 0.0696  | 3.1675  | -2.3081 |
| C  | -3.0477 | 1.0329  | 2.3722  |
| S  | -1.3022 | 1.1208  | 1.7925  |
| N  | 5.0942  | 2.1087  | 2.0957  |

H 2.9052 0.9961 2.8985  
H 1.9108 1.6193 1.5647  
H 4.4540 3.2885 -0.1328  
H 2.7687 2.6759 -0.1312  
H 5.8505 2.6802 1.7074  
H 5.1293 1.9804 3.1119  
H -3.1132 1.6465 3.2876  
H -3.3460 -0.0023 2.6002  
H -3.7275 1.4483 1.6108
